# Supplementary material for: Secretome of pleural effusions associated with non-small cell lung cancer (NSCLC) and malignant mesothelioma: therapeutic implications
Source: PubMed Central journal article supplement (PMC6849644; doi:10.18632/oncotarget.27290), 2019-11-05
Supplement: oncotarget-10-6456-s001.pdf [file oncotarget-10-6456-s001.pdf]

## Secretome of pleural effusions associated with non-small cell lung cancer (NSCLC) and malignant mesothelioma: therapeutic implications

### SUPPLEMENTARY MATERIALS

**Supplementary Table 1: Cytokines are ordered from highest to lowest concentration in benign PE**

| Analyte              | Benign, N = 13         |                   |                   | NSCLC, N = 101         |                   |                   | Mesothelioma, N = 8    |                   |                   | All CA, N = 109        |                   |                   | p-value<br>(Benign vs. All CA) |                        |
|----------------------|------------------------|-------------------|-------------------|------------------------|-------------------|-------------------|------------------------|-------------------|-------------------|------------------------|-------------------|-------------------|--------------------------------|------------------------|
|                      | Geometric mean [pg/mL] | LCI <sub>95</sub> | UCI <sub>95</sub> | Geometric mean [pg/mL] | LCI <sub>95</sub> | UCI <sub>95</sub> | Geometric mean [pg/mL] | LCI <sub>95</sub> | UCI <sub>95</sub> | Geometric mean [pg/mL] | LCI <sub>95</sub> | UCI <sub>95</sub> | 2-tailed Student's t-test      | (Bonferroni corrected) |
| sIL-6R $\alpha$      | 17,042                 | 10,803            | 26,886            | 21,114                 | 16,698            | 26,697            | 13,012                 | 9,575             | 17,683            | 20,377                 | 16,030            | 25,902            | NS                             |                        |
| CCL2/MCP1            | 4,975                  | 2,533             | 9,771             | 5,295                  | 4,781             | 5,863             | 5,458                  | 3,363             | 8,858             | 5,306                  | 4,659             | 6,043             | NS                             |                        |
| CXCL10/IP10          | 3,478                  | 1,864             | 6,491             | 4,705                  | 4,041             | 5,478             | 8,005                  | 3,591             | 17,844            | 4,892                  | 4,006             | 5,974             | NS                             |                        |
| IL-6                 | 2,638                  | 541               | 12,858            | 3,098                  | 2,338             | 4,105             | 1,893                  | 692               | 5,177             | 2,988                  | 2,138             | 4,176             | NS                             |                        |
| TGF $\beta$ 1        | 1,831                  | 1,198             | 2,798             | 1,944                  | 1,584             | 2,387             | 2,990                  | 1,404             | 6,372             | 2,007                  | 1,570             | 2,565             | NS                             |                        |
| GRO                  | 448                    | 226               | 889               | 362                    | 282               | 465               | 1,027                  | 347               | 3,042             | 391                    | 286               | 534               | NS                             |                        |
| CCL22/MDC            | 283                    | 148               | 542               | 1,092                  | 887               | 1,345             | 661                    | 288               | 1,515             | 1,053                  | 817               | 1,356             | <b>0.00007</b>                 | <b>0.0028</b>          |
| CXCL8/IL-8           | 142                    | 40                | 506               | 220                    | 174               | 278               | 278                    | 57                | 1,357             | 224                    | 161               | 312               | NS                             |                        |
| IL-10                | 131                    | 43                | 401               | 201                    | 173               | 233               | 235                    | 101               | 548               | 203                    | 166               | 248               | NS                             |                        |
| Eotaxin              | 97                     | 51                | 186               | 89                     | 79                | 102               | 243                    | 110               | 534               | 96                     | 81                | 115               | NS                             |                        |
| G-CSF                | 63                     | 18                | 223               | 240                    | 195               | 296               | 102                    | 11                | 963               | 226                    | 158               | 322               | 0.004                          | NS                     |
| IL-7                 | 56                     | 21                | 148               | 48                     | 41                | 56                | 87                     | 37                | 203               | 50                     | 41                | 61                | NS                             |                        |
| TNF $\alpha$         | 28                     | 15                | 55                | 38                     | 34                | 42                | 33                     | 15                | 73                | 38                     | 32                | 44                | NS                             |                        |
| IL-15                | 19                     | 8                 | 46                | 15                     | 13                | 18                | 15                     | 6                 | 39                | 15                     | 12                | 19                | NS                             |                        |
| MIP1 $\alpha$        | 17                     | 8                 | 39                | 12                     | 11                | 14                | 16                     | 8                 | 34                | 12                     | 11                | 15                | NS                             |                        |
| CX3CL1 / Fractalkine | 14                     | 5                 | 34                | 100                    | 77                | 130               | 139                    | 62                | 310               | 103                    | 76                | 139               | <b>0.000005</b>                | <b>0.0002</b>          |
| EGF                  | 6                      | 1                 | 42                | 7                      | 4                 | 10                | 8                      | 2                 | 40                | 7                      | 4                 | 11                | NS                             |                        |
| IL-5                 | 6                      | 1                 | 25                | 13                     | 9                 | 19                | 7                      | 2                 | 32                | 13                     | 8                 | 20                | NS                             |                        |
| IL-1R $\alpha$       | 6                      | 1                 | 33                | 43                     | 29                | 64                | 46                     | 4                 | 597               | 43                     | 25                | 76                | 0.00424                        | NS                     |
| VEGF                 | 5                      | 1                 | 20                | 152                    | 100               | 231               | 112                    | 9                 | 1,457             | 149                    | 84                | 264               | <b>0.000005</b>                | <b>0.0002</b>          |
| CCL7/MCP3            | 4                      | 1                 | 23                | 14                     | 8                 | 24                | 18                     | 2                 | 198               | 14                     | 7                 | 28                | NS                             |                        |
| Flt3L                | 3                      | 1                 | 16                | 15                     | 9                 | 23                | 8                      | 1                 | 40                | 14                     | 8                 | 24                | 0.046                          | NS                     |
| IL-1 $\beta$         | 3                      | 1                 | 11                | 7                      | 5                 | 10                | 3                      | 0                 | 18                | 7                      | 5                 | 10                | NS                             |                        |
| sCD40L               | 3                      | 1                 | 12                | 15                     | 10                | 23                | 25                     | 3                 | 176               | 16                     | 10                | 27                | 0.01357                        | NS                     |
| GM-CSF               | 3                      | 1                 | 8                 | 33                     | 25                | 45                | 20                     | 4                 | 93                | 32                     | 22                | 48                | <b>0.000005</b>                | <b>0.0002</b>          |
| CCL4/MIP1 $\beta$    | 3                      | 1                 | 9                 | 20                     | 15                | 26                | 20                     | 5                 | 82                | 20                     | 13                | 29                | <b>0.00006</b>                 | <b>0.0024</b>          |
| IL-12p40             | 2                      | 1                 | 7                 | 17                     | 11                | 27                | 11                     | 2                 | 57                | 17                     | 10                | 28                | 0.0035                         | NS                     |
| FGF2                 | 2                      | 1                 | 7                 | 41                     | 26                | 64                | 27                     | 4                 | 203               | 39                     | 22                | 70                | <b>0.00005</b>                 | <b>0.002</b>           |
| TGF $\alpha$         | 2                      | 1                 | 7                 | 3                      | 2                 | 4                 | 4                      | 1                 | 15                | 3                      | 2                 | 4                 | NS                             |                        |
| IFN $\gamma$         | 2                      | 1                 | 6                 | 13                     | 9                 | 18                | 4                      | 1                 | 25                | 12                     | 8                 | 18                | <b>0.00068</b>                 | <b>0.0272</b>          |

|                |   |   |   |    |    |    |    |   |     |    |    |    |         |        |
|----------------|---|---|---|----|----|----|----|---|-----|----|----|----|---------|--------|
| IL-1 $\alpha$  | 2 | 1 | 6 | 23 | 15 | 37 | 26 | 5 | 142 | 24 | 14 | 40 | 0.0002  | 0.008  |
| IL-4           | 2 | 0 | 5 | 3  | 2  | 4  | 9  | 1 | 61  | 3  | 2  | 5  | NS      |        |
| IL-9           | 1 | 0 | 4 | 1  | 1  | 2  | 1  | 0 | 6   | 1  | 1  | 2  | NS      |        |
| IL-13          | 1 | 0 | 4 | 3  | 2  | 4  | 1  | 0 | 7   | 2  | 1  | 4  | NS      |        |
| IL-17 $\alpha$ | 1 | 0 | 4 | 3  | 2  | 5  | 1  | 0 | 8   | 3  | 2  | 5  | NS      |        |
| IL-12p70       | 1 | 0 | 3 | 6  | 4  | 9  | 3  | 1 | 22  | 6  | 4  | 10 | 0.00634 | NS     |
| IL-2           | 1 | 0 | 3 | 2  | 1  | 3  | 1  | 0 | 7   | 2  | 1  | 3  | NS      |        |
| TNF $\beta$    | 1 | 0 | 4 | 24 | 12 | 52 | 1  | 0 | 7   | 19 | 8  | 45 | 0.01208 | NS     |
| IFN $\alpha$ 2 | 1 | 0 | 3 | 18 | 11 | 30 | 13 | 2 | 91  | 18 | 10 | 32 | 0.00024 | 0.0096 |
| IL-3           | 1 | 0 | 3 | 0  | 0  | 0  | 1  | 0 | 1   | 0  | 0  | 0  | NS      |        |

LCI<sub>95</sub>, UCI<sub>95</sub> = lower and upper 95% confidence intervals about the geometric mean.

|                    |                   |
|--------------------|-------------------|
| A                  | Delta/Average (%) |
| N of Cases         | 1,363             |
| Arithmetic Mean    | 5.8%              |
| Standard Deviation | 38.9%             |

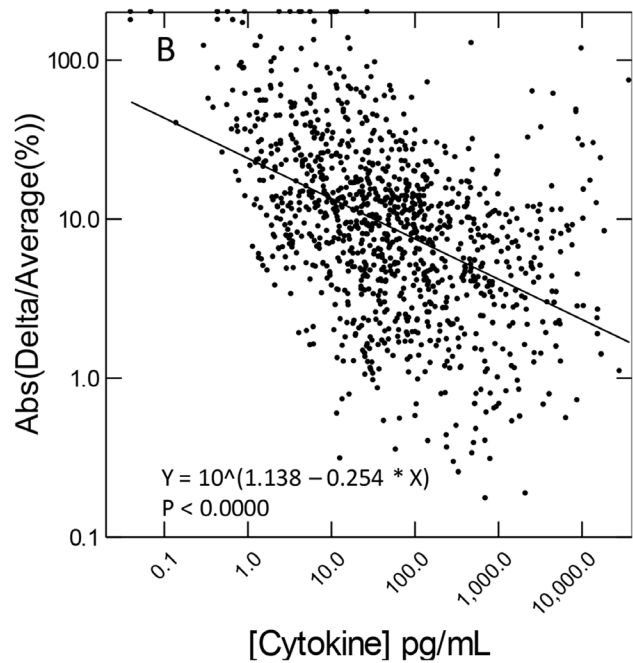

**Supplementary Figure 1: Agreement between replicate cytokine determinations.** A 38 cytokine/chemokine panel was run on 33 samples in duplicate or triplicate. Agreement between replicates was measured as the difference between replicates divided by their average, and expressed as a percent. (A) The mean difference between 1363 pairs of replicate determinations was 5.8%; (B) Replicate agreement was better at higher cytokine concentrations. Regression of the log absolute value of (delta/average) versus the log cytokine concentration had a highly significant negative slope ( $p < 0.0000$ ). The least squares line of best fit is shown.
